# Supplementary material for: Transition to the 2024 World Health Organization Hepatitis B Guidelines and the Implications for the Antiretroviral Therapy Uptake in Northwestern Tanzania: A Cross-Sectional Study
Source: Research Square preprint supplement (doi:10.21203/rs.3.rs-7919077/v1), 2025-11-11
Supplement: Supplementary file 1 [file bdd2a3127af3b86e85479414.docx]

**Table 4** **Demographic and clinical data**

| **Participants analysed as per new 2024 WHO HBV guidelines, N=297** | | | |
| --- | --- | --- | --- |
| **Demographic and clinical data: Proportions and p-values** | | | |
| **Characteristics (Variables)** | **Number, n** | **Percentage (%)** | **p-value** |
| **Gender, N=297** |  |  |  |
| Female | 54 | 18.2 | <0.005 |
| Male | 243 | 81.8 |
| **Residence (Region), N=297** |  |  |  |
| Mwanza | 99 | 33.3 |  |
| Mara | 55 | 18.5 |  |
| Simiyu | 41 | 13.8 |  |
| Geita | 31 | 10.5 |  |
| Shinyanga | 25 | 8.4 |  |
| Tabora | 16 | 5.4 |  |
| Kagera | 12 | 4.0 |  |
| Kigoma | 11 | 3.7 |  |
| Katavi | 3 | 1.0 |  |
| Rukwa | 2 | 0.7 |  |
| Singida | 2 | 0.7 |  |
| **Clinical characteristics** | |  |  |
| **HBV DNA levels (IU/mL), N=183** |  |  |  |
| HBV DNA levels <2,000 group | 74 | 40.4 | 0.0107 |
| HBV DNA levels >2,000 group | 109 | 59.6 |
| **ALT U/L, N=297** |  |  |  |
| ALT ≤41 group | 134 | 45.1 | 0.0928 |
| ALT >41 group | 163 | 54.9 |
| **ASTU/L, N=297** |  |  |  |
| AST ≤40 group | 115 | **38.7** | 0.0001 |
| AST >40 group | 182 | **61.3** |
| **Platelets cells/µL, N=297** |  |  |  |
| Platelets < 150 group | 102 | 34.3 |  |
| Platelets 150- 500 group | 185 | 62.3 |  |
| Platelets >500 group | 10 | 3.4 |  |
| **APRI score, N=297** |  |  |  |
| APRI < 0.5 | 100 | 33.7 | <0.005 |
| APRI ≥ 0.5 | 197 | 66.3 |
| **TE kPa, N=52** |  |  |  |
| TE <12.5 | 27 | 51.9 | 0.7842 |
| TE ≥12.5 | 25 | 48.1 |
| **Demographic and clinical data: Mean or median and standard deviation/interquartile range** | | | |
| **Characteristics (Variables)** | **Number, n** | **Median/Mean** | **Interquartile range [IQR]/±SD** |
| **Age (years)** | **297** | 40 | 34- 50 |
| **HBV DNA levels (whole study population) (IU/mL)** | **183** | 4,188 | 813- 69,300 |
| HBV DNA levels <2,000 | 74 | 337 | 46- 1,082 |
| HBV DNA levels >2,000 | 109 | 27,400 | 6,970- 647,362 |
| **ALT (whole study population) (U/L)** | **297** | 45.51 | [26.7- 87.15] |
| ALT ≤41U/L group | 134 | 25.54 | 19.5-36.06 |
| ALT >41 U/L group | 163 | 81.09 | 55.17-122.98 |
| **AST (whole study population) (IU/L)** | **297** | 62.81 | 28.8- 161.3 |
| AST ≤40 U/L group | 115 | 26.51 | 21.26-32.01 |
| AST >40 U/L group | 182 | 124.19 | 70.596-266.7 |
| **Platelets (whole study population) (cells/µL)** | **297** | 179 | 132- 255 |
| Platelets < 150 **cells/µL group** | 102 | 101 | 69-133 |
| Platelets 150- 500 **cells/µL group** | 185 | 226 | 179-278 |
| Platelets >500 **cells/µL** | 10 | 600 | 560-620 |
| **APRI (whole study population) score** | **297** | 0.96 | [0.38-2.75] |
| APRI < 0.5 group | 100 | 0.29 | 0.23-0.38 |
| APRI ≥ 0.5 group | 197 | 2.02 | 0.97-4.38 |
| **TE (whole study population)** | **52** | 12.25 | [6.65-19.35] |
| TE <12.5kPa | 27 | 6.7 | 5.7-7.6 |
| TE ≥12.5kPa | 25 | 19.9 | 15.4-49.3 |
| **Participants analysed as per new 2015 WHO HBV guidelines, N=269** | | | |
| **Demographic and clinical data: Proportions and p-values** | | | |
| **Characteristics (Variables)** | **Number, n** | **Percentage (%)** | **p-values** |
| **Gender, N=269** |  |  |  |
| Female | 51 | 19 | <0.005 |
| Male | 218 | 81 |
| **Residence (Region), N=269** |  |  |  |
| Mwanza | 89 | 33.1 |  |
| Mara | 46 | 17.1 |  |
| Simiyu | 39 | 14.50 |  |
| Geita | 25 | 9.3 |  |
| Shinyanga | 24 | 8.9 |  |
| Tabora | 16 | 6.0 |  |
| Kagera | 12 | 4.5 |  |
| Kigoma | 11 | 4.1 |  |
| Katavi | 3 | 1.1 |  |
| Singida | 2 | 0.7 |  |
| Rukwa | 2 | 0.7 |  |
| **Clinical characteristics** |  |  |  |
| **HBV DNA levels (IU/mL), N=183** |  |  |  |
| HBV DNA levels <20,000 group | 117 | 63.9 | 0.0003 |
| HBV DNA levels >20,000 group | 66 | 36.1 |
| **ALT U/L, N=269** |  |  |  |
| ALT ≤41 group | 125 | 46.5 | 0.2521 |
| ALT >41 group | 144 | 53.5 |
| **ASTU/L, N=269** |  |  |  |
| AST ≤40 group | 110 | 40.9 | 0.0033 |
| AST >40 group | 159 | 59.1 |
| **Platelets cells/µL, N=269** |  |  |  |
| Platelets < 150 group | 95 | 35.3 |  |
| Platelets 150- 500 group | 164 | 61 |  |
| Platelets >500 group | 10 | 3.7 |  |
| **APRI score, N=269** |  |  |  |
| APRI < 2 | 169 | 62.8 | <00005 |
| APRI ≥ 2 | 100 | 37.2 |
| **TE kPa, N=50** |  |  |  |
| TE <12.5 | 25 | 50 | 1.0 |
| TE ≥12.5 | 25 | 50 |
| **Demographic and clinical data: Mean or median and standard deviation/interquartile range** | | | |
| **Characteristics (Variables)** | **Number, n** | **Median/Mean** | **Interquartile range [IQR]/±SD** |
| **Age (years)** | **269** | 40 | [33- 49] |
| **HBV DNA levels (whole study population) (IU/mL)** | **183** | 4,188 | 813- 69,300 |
| HBV DNA levels <20,000 | 117 | 1,166 | 210- 3,509 |
| HBV DNA levels >20,000 | 66 | 386,430 | 39,000- 2,700,000 |
| **ALT (whole study population) (U/L)** | **269** | 45.19 | [25.84- 87.6] |
| ALT ≤41U/L group | 125 | 25.3 | 18.79-36.0 |
| ALT >41 U/L group | 144 | 82.71 | 55.71-127.32 |
| **AST (whole study population) (IU/L)** | **269** | 60.71 | [27.65- 193.98] |
| AST ≤40 U/L group | 110 | 26.35 | 21.14- 31.71 |
| AST >40 U/L group | 159 | 139.52 | 75.99-287.56 |
| **Platelets (whole study population) (cells/µL)** | **269** | 179 | [129- 252] |
| Platelets < 150 **cells/µL group** | 95 | 103 | 69-133 |
| Platelets 150- 500 **cells/µL group** | 164 | 222 | 179-275.5 |
| Platelets >500 **cells/µL** | 10 | 600 | 560-620 |
| **APRI (whole study population) score** | **269** | 0.93 | [0.38-2.94] |
| APRI < 2 group | 169 | 0.44 | 0.27-0.76 |
| APRI ≥ 2group | 100 | 4.37 | 2.71-6.04 |
| **TE (whole study population)** | **50** | 12.55 | [6.6-19.9] |
| TE <12.5kPa | 25 | 6.6 | 5.7-7.6 |
| TE ≥12.5kPa | 25 | 19.9 | 15.4-49.3 |

HBV DNA: Hepatitis deoxyribonucleic acid, ALT: Alanine Amino Transferase, AST: Aspartate Amino Transferase, THR: Thrombocytes, IQR: Interquartile Range, APRI: Aspartate–Platelet Ratio Index, and TE: Transient Elastography.

HBV DNA: Hepatitis deoxyribonucleic acid, ALT: Alanine Amino Transferase, AST: Aspartate Amino Transferase, THR: Thrombocytes, IQR: Interquartile Range, APRI: Aspartate–Platelet Ratio Index, TE: Transient Elastography.
