# Supplementary material for: Transition to the 2024 World Health Organization Hepatitis B Guidelines and the Implications for the Antiretroviral Therapy Uptake in Northwestern Tanzania: A Cross-Sectional Study
Source: Research Square preprint supplement (doi:10.21203/rs.3.rs-7919077/v1), 2025-11-11
Supplement: Supplementary file 2 [file c319a6af59f67f2f58691d26.docx]

**Table 6 Types of antiretroviral drugs used**

|  | |  | **Drugs used** | **Number (n)** | **Per cent (%)** |
| --- | --- | --- | --- | --- | --- |
|  | **NEW 2024 WHO GUIDELINE GROUP** | | | | |
| **In the eligible patients (N=75)** | |  | TDF | 63 | 84 |
|  | TAF | 4 | 5.3 |
|  | TLD | 6 | 8 |
|  | |  | TRUVADA | 2 | 2.7 |
|  | |  | TLE | 0 | 0.0 |
| **In the non-eligible patients (N=12)** | |  |  |  |  |
|  | |  | TDF | 9 | 75 |
|  | TAF | 1 | 8.4 |
|  | TLD | 0 | 0.0 |
|  | TRUVADA | 1 | 8.3 |
|  | TLE | 1 | 8.3 |
| **OLD 2015 WHO GUIDELINE GROUP** | |  |  |  |  |
| **In the eligible patients (N=56)** | |  | TDF | 46 | 82.1 |
|  | |  | TAF | 4 | 7.2 |
|  | |  | TLD | 6 | 10.7 |
|  | |  | TRUVADA | 0 | 0 |
|  | |  | TLE | 0 | 0 |
| **In the non-eligible patients (N=25)** | |  |  |  |  |
|  | |  | TDF | 21 | 84 |
|  | |  | TAF | 1 | 4 |
|  | |  | TLD | 0 | 0 |
|  | |  | TRUVADA | 2 | 8 |
|  | |  | TLE | 1 | 4 |

TDF: Tenofovir disoproxil fumarate, TAF: Tenofovir Alafenamide fumarate, TLD: Tenofovir-Lamivudine-Dolutegravir, ARV: Antiretroviral, TRUVADA: Fixed antiviral drug combination composed of Emtricitabine (FTC) and tenofovir disoproxil fumarate (TDF).
